# Supplementary material
Source: HighWire-hosted journal article supplement (https://jnm.snmjournals.org/highwire/filestream/99574/field_highwire_adjunct_files/0/246363_Supplemental_Data.pdf)
Supplement: 246363_Supplemental_Data.pdf [file 246363_Supplemental_Data.pdf]

**Supplemental Table 1:** Imaging protocol used at different sites

| Site                                 | Positronmed<br>Santiago<br>Chile                   | Heidelberg<br>University<br>Hospital               | Münster<br>University<br>Hospital  | Technical<br>University<br>Munich                 | Osaka<br>University<br>Hospital                   |
|--------------------------------------|----------------------------------------------------|----------------------------------------------------|------------------------------------|---------------------------------------------------|---------------------------------------------------|
| PET/CT<br>scanner                    | Biograph<br>mCT/ mCT<br>Flow,<br>Siemens           | Biograph<br>mCT Flow,<br>Siemens                   | Biograph<br>mCT,<br>Siemens        | Biograph<br>mCT,<br>Siemens                       | Discovery<br>710, GE                              |
| PET<br>aquisition<br>time / min p.i. | 72±14<br>(range: 47-<br>122)                       | 93 ± 20<br>(range: 61-<br>124)                     | 137 ± 17<br>(range: 118-<br>154)   | 88 ± 29<br>(range: 60–<br>169)                    | NA                                                |
| Injected<br>activity / MBq           | 273±16<br>(range: 236-<br>305)                     | 250±57<br>(range: 106-<br>353)                     | 292.5 ± 34<br>(range: 243-<br>336) | 310 ±24<br>(range: 270–<br>356)                   | NA                                                |
| Reconstruc-<br>tion                  | OSEM<br>algorithm (2<br>iterations, 21<br>subsets) | OSEM<br>algorithm (2<br>iterations, 21<br>subsets) |                                    | OSEM<br>algorithm (4<br>iterations, 8<br>subsets) | OSEM<br>algorithm (3<br>iterations, 8<br>subsets) |
| Corrections                          | Scatter,<br>attenuation,<br>TOF                    | Randoms,<br>scatter,<br>attenuation,<br>decay      | Scatter,<br>attenuation,<br>TOF    | Randoms,<br>dead time,<br>scatter,<br>attenuation | Randoms,<br>scatter,<br>attenuation,<br>decay     |
| Filer                                | Gaussian 4<br>mm FWHM                              | Gaussian 5<br>mm FWHM                              |                                    | Gaussian 5<br>mm FWHM                             | Gaussian 4<br>mm FWHM                             |

**Supplemental Table 2:** Findings in individual patients and comparison of PSMA-PET/CT and histopathology for all positive lymph nodes.

| Patient | LN total Histo | number of positive LN seen in the area of LND in PET/CT | number of positive LN according to histopathology | TP | FP | TN | FN | patient-based sensitivity | patient-based specificity |
|---------|----------------|---------------------------------------------------------|---------------------------------------------------|----|----|----|----|---------------------------|---------------------------|
| 1       | 32             | 3                                                       | 3                                                 | 3  | 0  | 29 | 0  | 1                         | 1                         |
| 2       | 16             | 7                                                       | 7                                                 | 7  | 0  | 9  | 0  | 1                         | 1                         |
| 3       | 19             | 0                                                       | 0                                                 | 0  | 0  | 19 | 0  |                           | 1                         |
| 4       | 10             | 0                                                       | 1                                                 | 0  | 0  | 9  | 1  | 0                         | 1                         |
| 5       | 37             | 0                                                       | 0                                                 | 0  | 0  | 37 | 0  |                           | 1                         |
| 6       | 13             | 2                                                       | 4                                                 | 2  | 0  | 9  | 2  | 0.5                       | 1                         |
| 7       | 18             | 0                                                       | 0                                                 | 0  | 0  | 18 | 0  |                           | 1                         |
| 8       | 16             | 0                                                       | 0                                                 | 0  | 0  | 16 | 0  |                           | 1                         |
| 9       | 16             | 0                                                       | 0                                                 | 0  | 0  | 16 | 0  |                           | 1                         |
| 10      | 11             | 0                                                       | 0                                                 | 0  | 0  | 11 | 0  |                           | 1                         |
| 11      | 17             | 2                                                       | 2                                                 | 2  | 0  | 15 | 0  | 1                         | 1                         |
| 12      | 34             | 4                                                       | 4                                                 | 4  | 0  | 30 | 0  | 1                         | 1                         |
| 13      | 15             | 1                                                       | 1                                                 | 1  | 0  | 14 | 0  | 1                         | 1                         |
| 14      | 8              | 0                                                       | 0                                                 | 0  | 0  | 8  | 0  |                           | 1                         |
| 15      | 12             | 0                                                       | 0                                                 | 0  | 0  | 12 | 0  |                           | 1                         |
| 16      | 14             | 0                                                       | 0                                                 | 0  | 0  | 14 | 0  |                           | 1                         |
| 17      | 14             | 2                                                       | 1                                                 | 1  | 1  | 12 | 0  | 1                         | 0.92                      |
| 18      | 9              | 0                                                       | 0                                                 | 0  | 0  | 9  | 0  |                           | 1                         |
| 19      | 11             | 1                                                       | 0                                                 | 0  | 1  | 10 | 0  |                           | 0.91                      |
| 20      | 15             | 0                                                       | 0                                                 | 0  | 0  | 15 | 0  |                           | 1                         |
| 21      | 18             | 1                                                       | 2                                                 | 1  | 0  | 16 | 1  | 0.5                       | 1                         |
| 22      | 4              | 0                                                       | 0                                                 | 0  | 0  | 4  | 0  |                           | 1                         |
| 23      | 8              | 0                                                       | 0                                                 | 0  | 0  | 8  | 0  |                           | 1                         |
| 24      | 10             | 0                                                       | 0                                                 | 0  | 0  | 10 | 0  |                           | 1                         |
| 25      | 9              | 1                                                       | 0                                                 | 0  | 1  | 8  | 0  |                           | 0.89                      |
| 26      | 10             | 0                                                       | 0                                                 | 0  | 0  | 10 | 0  |                           | 1                         |
| 27      | 22             | 0                                                       | 0                                                 | 0  | 0  | 22 | 0  |                           | 1                         |
| 28      | 17             | 0                                                       | 0                                                 | 0  | 0  | 17 | 0  |                           | 1                         |
| 29      | 15             | 0                                                       | 0                                                 | 0  | 0  | 15 | 0  |                           | 1                         |

|    |    |    |    |    |   |    |   |      |      |
|----|----|----|----|----|---|----|---|------|------|
| 30 | 24 | 0  | 0  | 0  | 0 | 24 | 0 |      | 1    |
| 31 | 21 | 0  | 0  | 0  | 0 | 21 | 0 |      | 1    |
| 32 | 11 | 0  | 0  | 0  | 0 | 11 | 0 |      | 1    |
| 33 | 20 | 0  | 0  | 0  | 0 | 20 | 0 |      | 1    |
| 34 | 7  | 0  | 0  | 0  | 0 | 7  | 0 |      | 1    |
| 35 | 13 | 0  | 0  | 0  | 0 | 13 | 0 |      | 1    |
| 36 | 12 | 0  | 0  | 0  | 0 | 12 | 0 |      | 1    |
| 37 | 9  | 0  | 0  | 0  | 0 | 9  | 0 |      | 1    |
| 38 | 19 | 0  | 0  | 0  | 0 | 19 | 0 |      | 1    |
| 39 | 16 | 0  | 0  | 0  | 0 | 16 | 0 |      | 1    |
| 40 | 20 | 3  | 3  | 3  | 0 | 17 | 0 | 1    | 1    |
| 41 | 10 | 0  | 0  | 0  | 0 | 10 | 0 |      | 1    |
| 42 | 19 | 1  | 1  | 1  | 0 | 18 | 0 | 1    | 1    |
| 43 | 21 | 0  | 0  | 0  | 0 | 21 | 0 |      | 1    |
| 44 | 21 | 0  | 0  | 0  | 0 | 21 | 0 |      | 1    |
| 45 | 27 | 0  | 0  | 0  | 0 | 27 | 0 |      | 1    |
| 46 | 61 | 3  | 5  | 3  | 0 | 56 | 2 | 0.6  | 1    |
| 47 | 15 | 0  | 0  | 0  | 0 | 15 | 0 |      | 1    |
| 48 | 21 | 0  | 0  | 0  | 0 | 21 | 0 |      | 1    |
| 49 | 31 | 3  | 4  | 3  | 0 | 27 | 1 | 0.75 | 1    |
| 50 | 15 | 1  | 1  | 1  | 0 | 14 | 0 | 1    | 1    |
| 51 | 24 | 1  | 1  | 1  | 0 | 23 | 0 | 1    | 1    |
| 52 | 24 | 3  | 3  | 3  | 0 | 21 | 0 | 1    | 1    |
| 53 | 32 | 0  | 0  | 0  | 0 | 32 | 0 |      | 1    |
| 54 | 5  | 0  | 0  | 0  | 0 | 5  | 0 |      | 1    |
| 55 | 12 | 0  | 0  | 0  | 0 | 12 | 0 |      | 1    |
| 56 | 39 | 16 | 14 | 14 | 2 | 23 | 0 | 1    | 0.92 |
| 57 | 12 | 0  | 0  | 0  | 0 | 12 | 0 |      | 1    |
| 58 | 28 | 0  | 0  | 0  | 0 | 28 | 0 |      | 1    |
| 59 | 23 | 1  | 2  | 1  | 0 | 21 | 1 | 0.5  | 1    |
| 60 | 21 | 0  | 0  | 0  | 0 | 21 | 0 |      | 1    |
| 61 | 26 | 0  | 3  | 0  | 0 | 23 | 3 | 0    | 1    |
| 62 | 23 | 0  | 0  | 0  | 0 | 23 | 0 |      | 1    |
| 63 | 15 | 2  | 0  | 0  | 2 | 13 | 0 |      | 0.87 |
| 64 | 13 | 1  | 3  | 1  | 0 | 10 | 2 | 0.33 | 1    |
| 65 | 26 | 0  | 0  | 0  | 0 | 26 | 0 |      | 1    |
| 66 | 17 | 0  | 0  | 0  | 0 | 17 | 0 |      | 1    |
| 67 | 27 | 1  | 2  | 1  | 0 | 25 | 1 | 0.5  | 1    |
| 68 | 14 | 0  | 0  | 0  | 0 | 14 | 0 |      | 1    |
| 69 | 23 | 3  | 8  | 3  | 0 | 15 | 5 | 0.38 | 1    |

|    |             |           |            |           |          |             |           |               |               |
|----|-------------|-----------|------------|-----------|----------|-------------|-----------|---------------|---------------|
| 70 | 18          | 0         | 0          | 0         | 0        | 18          | 0         |               | 1             |
| 71 | 15          | 0         | 0          | 0         | 0        | 15          | 0         |               | 1             |
| 72 | 19          | 1         | 0          | 0         | 1        | 18          | 0         |               | 0.95          |
| 73 | 35          | 0         | 0          | 0         | 0        | 34          | 1         | 0             | 1             |
| 74 | 30          | 2         | 3          | 2         | 0        | 27          | 1         | 0.67          | 1             |
| 75 | 24          | 0         | 0          | 0         | 0        | 24          | 0         |               | 1             |
| 76 | 17          | 0         | 0          | 0         | 0        | 17          | 0         |               | 1             |
| 77 | 12          | 1         | 1          | 1         | 0        | 11          | 0         | 1             | 1             |
| 78 | 5           | 0         | 0          | 0         | 0        | 5           | 0         |               | 1             |
| 79 | 14          | 0         | 0          | 0         | 0        | 14          | 0         |               | 1             |
| 80 | 12          | 0         | 0          | 0         | 0        | 12          | 0         |               | 1             |
| 81 | 11          | 0         | 0          | 0         | 0        | 11          | 0         |               | 1             |
| 82 | 21          | 10        | 13         | 10        | 0        | 8           | 3         | 0.77          | 1             |
| 83 | 33          | 7         | 11         | 7         | 0        | 22          | 4         | 0.64          | 1             |
| 84 | 22          | 0         | 0          | 0         | 0        | 22          | 0         |               | 1             |
| 85 | 10          | 0         | 0          | 0         | 0        | 10          | 0         |               | 1             |
| 86 | 17          | 0         | 0          | 0         | 0        | 17          | 0         |               | 1             |
| 87 | 28          | 0         | 0          | 0         | 0        | 28          | 0         |               | 1             |
| 88 | 10          | 0         | 0          | 0         | 0        | 10          | 0         |               | 1             |
| 89 | 11          | 1         | 1          | 1         | 0        | 10          | 0         | 1             | 1             |
| 90 | 6           | 0         | 0          | 0         | 0        | 6           | 0         |               | 1             |
| 91 | 34          | 4         | 10         | 4         | 0        | 24          | 6         | 0.4           | 1             |
| 92 | 32          | 1         | 1          | 1         | 0        | 31          | 0         | 1             | 1             |
| 93 | 3           | 0         | 0          | 0         | 0        | 3           | 0         |               | 1             |
| 94 | 26          | 1         | 1          | 1         | 0        | 25          | 0         | 1             | 1             |
| 95 | 12          | 0         | 0          | 0         | 0        | 12          | 0         |               | 1             |
| 96 | 2           | 1         | 1          | 1         | 0        | 1           | 0         | 1             | 1             |
|    | <b>1746</b> | <b>92</b> | <b>117</b> | <b>84</b> | <b>8</b> | <b>1620</b> | <b>34</b> | <b>0.7353</b> | <b>0.9943</b> |

**Supplemental Table 3:** Findings in individual patients and comparison of PSMA-PET/CT and histopathology for positive lymph nodes >3mm.

| Patient | LN total Histo | number of positive LN seen in the area of LND in PET/CT | number of positive LN according to histopathology | TP | FP | TN | FN | patient-based-sensitivity | patient-based specificity |
|---------|----------------|---------------------------------------------------------|---------------------------------------------------|----|----|----|----|---------------------------|---------------------------|
| 1       | 32             | 3                                                       | 3                                                 | 3  | 0  | 29 | 0  | 1                         | 1                         |
| 2       | 16             | 7                                                       | 7                                                 | 7  | 0  | 9  | 0  | 1                         | 1                         |
| 3       | 19             | 0                                                       | 0                                                 | 0  | 0  | 19 | 0  |                           | 1                         |
| 4       | 10             | 0                                                       | 1                                                 | 0  | 0  | 9  | 1  | 0                         | 1                         |
| 5       | 37             | 0                                                       | 0                                                 | 0  | 0  | 37 | 0  |                           | 1                         |
| 6       | 13             | 2                                                       | 4                                                 | 2  | 0  | 9  | 2  | 0.5                       | 1                         |
| 7       | 18             | 0                                                       | 0                                                 | 0  | 0  | 18 | 0  |                           | 1                         |
| 8       | 16             | 0                                                       | 0                                                 | 0  | 0  | 16 | 0  |                           | 1                         |
| 9       | 16             | 0                                                       | 0                                                 | 0  | 0  | 16 | 0  |                           | 1                         |
| 10      | 11             | 0                                                       | 0                                                 | 0  | 0  | 11 | 0  |                           | 1                         |
| 11      | 17             | 2                                                       | 2                                                 | 2  | 0  | 15 | 0  | 1                         | 1                         |
| 12      | 34             | 4                                                       | 4                                                 | 4  | 0  | 30 | 0  | 1                         | 1                         |
| 13      | 15             | 1                                                       | 1                                                 | 1  | 0  | 14 | 0  | 1                         | 1                         |
| 14      | 8              | 0                                                       | 0                                                 | 0  | 0  | 8  | 0  |                           | 1                         |
| 15      | 12             | 0                                                       | 0                                                 | 0  | 0  | 12 | 0  |                           | 1                         |
| 16      | 14             | 0                                                       | 0                                                 | 0  | 0  | 14 | 0  |                           | 1                         |
| 17      | 14             | 2                                                       | 1                                                 | 1  | 1  | 12 | 0  | 1                         | .92                       |
| 18      | 9              | 0                                                       | 0                                                 | 0  | 0  | 9  | 0  |                           | 1                         |
| 19      | 11             | 1                                                       | 0                                                 | 0  | 1  | 10 | 0  |                           | 0.91                      |
| 20      | 15             | 0                                                       | 0                                                 | 0  | 0  | 15 | 0  |                           | 1                         |
| 21      | 18             | 1                                                       | 2                                                 | 1  | 0  | 16 | 1  | 0.5                       | 1                         |
| 22      | 4              | 0                                                       | 0                                                 | 0  | 0  | 4  | 0  |                           | 1                         |
| 23      | 8              | 0                                                       | 0                                                 | 0  | 0  | 8  | 0  |                           | 1                         |
| 24      | 10             | 0                                                       | 0                                                 | 0  | 0  | 10 | 0  |                           | 1                         |
| 25      | 9              | 1                                                       | 0                                                 | 0  | 1  | 8  | 0  |                           | 0.89                      |
| 26      | 10             | 0                                                       | 0                                                 | 0  | 0  | 10 | 0  |                           | 1                         |
| 27      | 22             | 0                                                       | 0                                                 | 0  | 0  | 22 | 0  |                           | 1                         |
| 28      | 17             | 0                                                       | 0                                                 | 0  | 0  | 17 | 0  |                           | 1                         |
| 29      | 15             | 0                                                       | 0                                                 | 0  | 0  | 15 | 0  |                           | 1                         |
| 30      | 24             | 0                                                       | 0                                                 | 0  | 0  | 24 | 0  |                           | 1                         |
| 31      | 21             | 0                                                       | 0                                                 | 0  | 0  | 21 | 0  |                           | 1                         |

|    |    |    |    |    |   |    |   |      |      |
|----|----|----|----|----|---|----|---|------|------|
| 32 | 11 | 0  | 0  | 0  | 0 | 11 | 0 |      | 1    |
| 33 | 20 | 0  | 0  | 0  | 0 | 20 | 0 |      | 1    |
| 34 | 7  | 0  | 0  | 0  | 0 | 7  | 0 |      | 1    |
| 35 | 13 | 0  | 0  | 0  | 0 | 13 | 0 |      | 1    |
| 36 | 12 | 0  | 0  | 0  | 0 | 12 | 0 |      | 1    |
| 37 | 9  | 0  | 0  | 0  | 0 | 9  | 0 |      | 1    |
| 38 | 19 | 0  | 0  | 0  | 0 | 19 | 0 |      | 1    |
| 39 | 16 | 0  | 0  | 0  | 0 | 16 | 0 |      | 1    |
| 40 | 20 | 3  | 3  | 3  | 0 | 17 | 0 | 1    | 1    |
| 41 | 10 | 0  | 0  | 0  | 0 | 10 | 0 |      | 1    |
| 42 | 19 | 1  | 1  | 1  | 0 | 18 | 0 | 1    | 1    |
| 43 | 21 | 0  | 0  | 0  | 0 | 21 | 0 |      | 1    |
| 44 | 21 | 0  | 0  | 0  | 0 | 21 | 0 |      | 1    |
| 45 | 27 | 0  | 0  | 0  | 0 | 27 | 0 |      | 1    |
| 46 | 61 | 3  | 4  | 3  | 0 | 57 | 1 | 0.75 | 1    |
| 47 | 15 | 0  | 0  | 0  | 0 | 15 | 0 |      | 1    |
| 48 | 21 | 0  | 0  | 0  | 0 | 21 | 0 |      | 1    |
| 49 | 31 | 3  | 3  | 3  | 0 | 28 | 0 | 1    | 1    |
| 50 | 15 | 1  | 1  | 1  | 0 | 14 | 0 | 1    | 1    |
| 51 | 24 | 1  | 1  | 1  | 0 | 23 | 0 | 1    | 1    |
| 52 | 24 | 3  | 3  | 3  | 0 | 21 | 0 | 1    | 1    |
| 53 | 32 | 0  | 0  | 0  | 0 | 32 | 0 |      | 1    |
| 54 | 5  | 0  | 0  | 0  | 0 | 5  | 0 |      | 1    |
| 55 | 12 | 0  | 0  | 0  | 0 | 12 | 0 |      | 1    |
| 56 | 39 | 16 | 14 | 14 | 2 | 23 | 0 | 1    | 0.92 |
| 57 | 12 | 0  | 0  | 0  | 0 | 12 | 0 |      | 1    |
| 58 | 28 | 0  | 0  | 0  | 0 | 28 | 0 |      | 1    |
| 59 | 23 | 1  | 2  | 1  | 0 | 21 | 1 | 0.5  | 1    |
| 60 | 21 | 0  | 0  | 0  | 0 | 21 | 0 |      | 1    |
| 61 | 26 | 0  | 0  | 0  | 0 | 26 | 0 |      | 1    |
| 62 | 23 | 0  | 0  | 0  | 0 | 23 | 0 |      | 1    |
| 63 | 15 | 2  | 1  | 1  | 1 | 13 | 0 | 1    | 0.93 |
| 64 | 13 | 1  | 1  | 1  | 0 | 12 | 0 | 1    | 1    |
| 65 | 26 | 0  | 0  | 0  | 0 | 26 | 0 |      | 1    |
| 66 | 17 | 0  | 0  | 0  | 0 | 17 | 0 |      | 1    |
| 67 | 27 | 1  | 1  | 1  | 0 | 26 | 0 | 1    | 1    |
| 68 | 14 | 0  | 0  | 0  | 0 | 14 | 0 |      | 1    |
| 69 | 23 | 3  | 5  | 3  | 0 | 18 | 2 | 0.6  | 1    |
| 70 | 18 | 0  | 0  | 0  | 0 | 18 | 0 |      | 1    |
| 71 | 15 | 0  | 0  | 0  | 0 | 15 | 0 |      | 1    |

|    |             |           |            |           |          |             |           |               |               |
|----|-------------|-----------|------------|-----------|----------|-------------|-----------|---------------|---------------|
| 72 | 19          | 1         | 0          | 0         | 1        | 18          | 0         |               | 0.95          |
| 73 | 35          | 0         | 0          | 0         | 0        | 35          | 0         |               | 1             |
| 74 | 30          | 2         | 3          | 2         | 0        | 27          | 1         | 0.67          | 1             |
| 75 | 24          | 0         | 0          | 0         | 0        | 24          | 0         |               | 1             |
| 76 | 17          | 0         | 0          | 0         | 0        | 17          | 0         |               | 1             |
| 77 | 12          | 1         | 1          | 1         | 0        | 11          | 0         | 1             | 1             |
| 78 | 5           | 0         | 0          | 0         | 0        | 5           | 0         |               | 1             |
| 79 | 14          | 0         | 0          | 0         | 0        | 14          | 0         |               | 1             |
| 80 | 12          | 0         | 0          | 0         | 0        | 12          | 0         |               | 1             |
| 81 | 11          | 0         | 0          | 0         | 0        | 11          | 0         |               | 1             |
| 82 | 21          | 10        | 13         | 10        | 0        | 8           | 3         | 0.77          | 1             |
| 83 | 33          | 7         | 9          | 7         | 0        | 24          | 2         | 0.78          | 1             |
| 84 | 22          | 0         | 0          | 0         | 0        | 22          | 0         |               | 1             |
| 85 | 10          | 0         | 0          | 0         | 0        | 10          | 0         |               | 1             |
| 86 | 17          | 0         | 0          | 0         | 0        | 17          | 0         |               | 1             |
| 87 | 28          | 0         | 0          | 0         | 0        | 28          | 0         |               | 1             |
| 88 | 10          | 0         | 0          | 0         | 0        | 10          | 0         |               | 1             |
| 89 | 11          | 1         | 1          | 1         | 0        | 10          | 0         | 1             | 1             |
| 90 | 6           | 0         | 0          | 0         | 0        | 6           | 0         |               | 1             |
| 91 | 34          | 4         | 9          | 4         | 0        | 25          | 5         | 0.44          | 1             |
| 92 | 32          | 1         | 1          | 1         | 0        | 31          | 0         | 1             | 1             |
| 93 | 3           | 0         | 0          | 0         | 0        | 3           | 0         |               | 1             |
| 94 | 26          | 1         | 1          | 1         | 0        | 25          | 0         | 1             | 1             |
| 95 | 12          | 0         | 0          | 0         | 0        | 12          | 0         |               | 1             |
| 96 | 2           | 1         | 1          | 1         | 0        | 1           | 0         | 1             | 1             |
|    | <b>1746</b> | <b>92</b> | <b>104</b> | <b>85</b> | <b>7</b> | <b>1635</b> | <b>19</b> | <b>0.8551</b> | <b>0.9949</b> |
